# Supplementary material for: miR-106b-5p promotes cell proliferation and cell cycle progression by directly targeting CDKN1A in osteosarcoma
Source: PubMed Central journal article supplement — Exp Ther Med. 2020 Mar 6;19(5):3203–10. doi: 10.3892/etm.2020.8574 (PMC7132225; doi:10.3892/etm.2020.8574), 2020-03-06

Figure S1. Luciferase reporter assays were performed on 293T cells following transfection. (A) CDC37L1 and (B) CCNG2 3'-UTR vectors and miR-106b-5p inhibitor or miR-NC were transfected. WT, wild-type; MUT, mutant; UTR, untranslated region; miR, microRNA; NC, negative control.

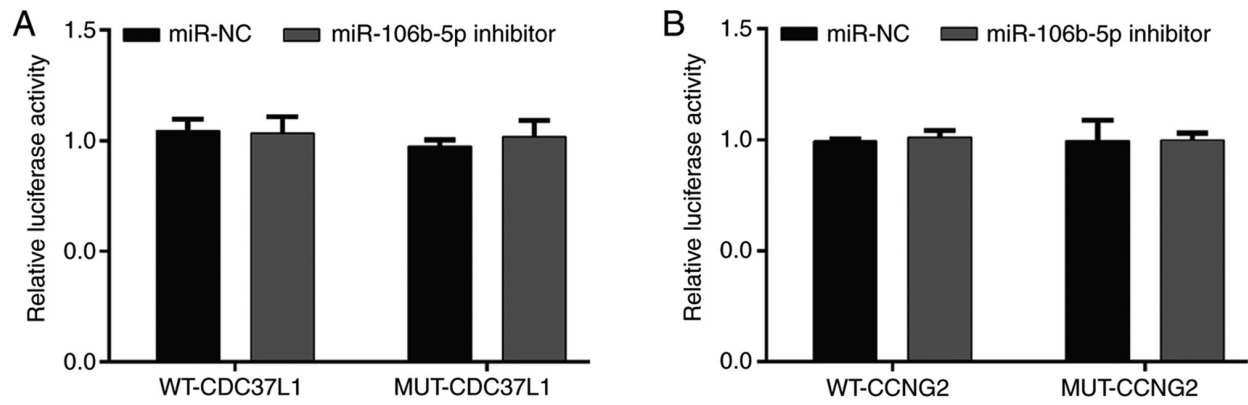

Supplement: Supplementary_Data.pdf [file Supplementary_Data.pdf]
